# Supplementary material for: Eigenvector Centrality Mapping for Analyzing Connectivity Patterns in fMRI Data of the Human Brain
Source: PubMed Central journal article supplement (PMC2860504; doi:10.1371/journal.pone.0010232), 2010-04-27
Supplement: pone.0010232.s001.pdf [file pone.0010232.s001.pdf]

## Supporting Information 1

Example of a symmetric matrix  $A$  with negative values and multiple largest eigenvalues so that the first principal component is not unique. Note that  $A$  is positive semidefinite and symmetric (as are covariance matrices). The columns in matrix  $E$  are the eigenvectors of  $A$  with eigenvalues  $\lambda_1 = 1.2$ ,  $\lambda_2 = 1.2$ ,  $\lambda_3 = 0.6$ .

$$A = \begin{pmatrix} 1.000 & 0.200 & 0.200 \\ 0.200 & 1.000 & -0.200 \\ 0.200 & -0.200 & 1.000 \end{pmatrix}, \quad E = \begin{pmatrix} 0.816 & 0.000 & 0.577 \\ 0.408 & -0.707 & -0.577 \\ 0.408 & 0.707 & -0.577 \end{pmatrix}$$
