# Supplementary material for: Eigenvector Centrality Mapping for Analyzing Connectivity Patterns in fMRI Data of the Human Brain
Source: PubMed Central journal article supplement (PMC2860504; doi:10.1371/journal.pone.0010232), 2010-04-27
Supplement: pone.0010232.s002.pdf [file pone.0010232.s002.pdf]

## Supporting Information 2

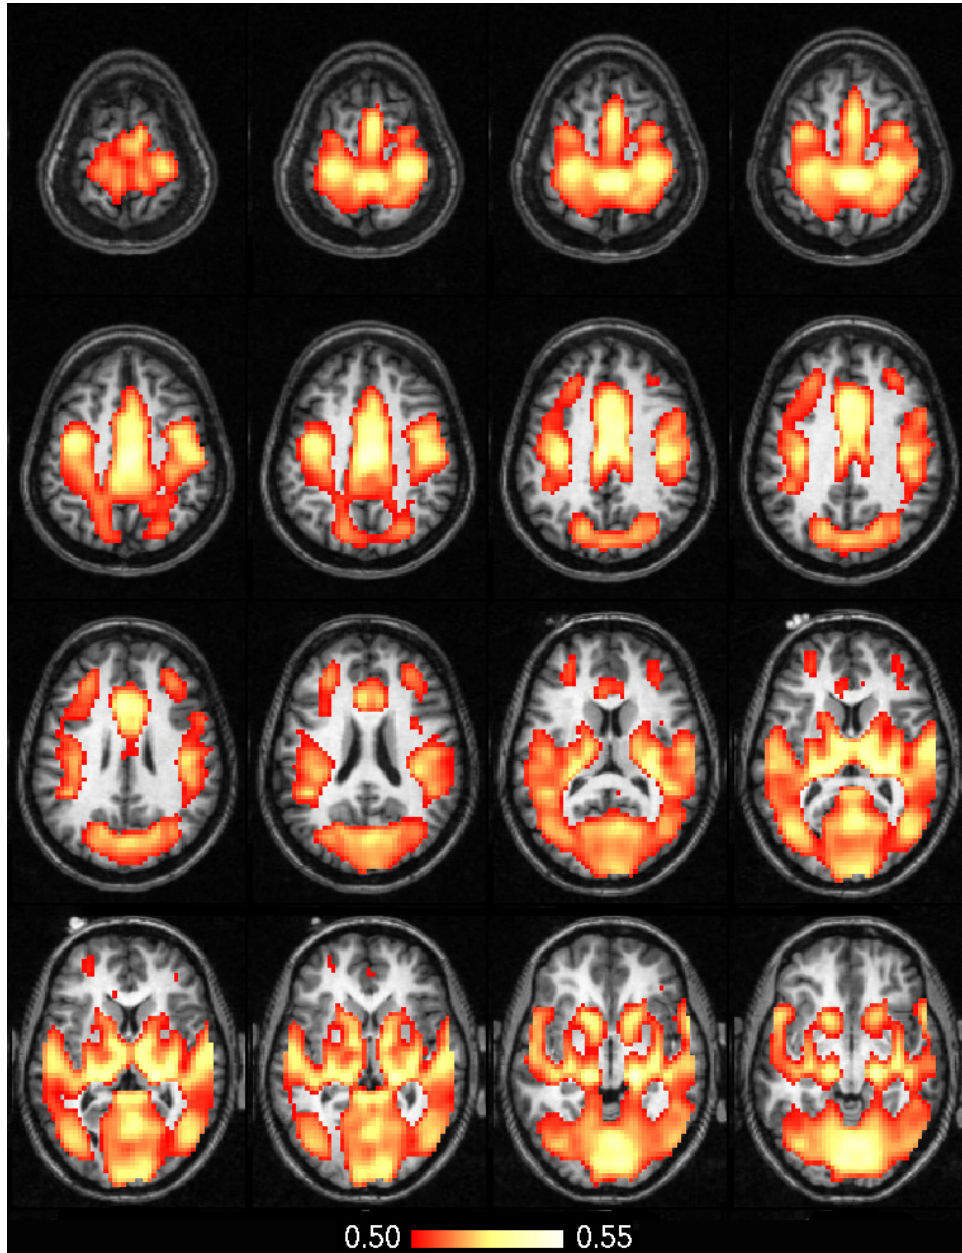

Axial slices of ECM group averages in experiment 2 (sated state).
